# Supplementary material for: Design and synthesis of solution processable green fluorescent D–π–A dyads for OLED applications
Source: Royal Society of Chemistry journal article supplement (doi:10.1039/c7nj04386d), 2018-01-01
Supplement: c7nj04386d1.pdf [file c7nj04386d1.pdf]

## Supplementary Information

### Design and synthesis of solution processable green fluorescent D- $\pi$ -A dyads for OLED applications

Shameel Thurakkal,<sup>a,b</sup> Krishnankutty S. Sanju,<sup>b,c</sup> Anjaly Soman,<sup>a,b</sup> K. N. Narayanan Unni,<sup>a,b</sup>  
Joshy Joseph\*<sup>a,b</sup> and Danaboyina Ramaiah\*<sup>b,d</sup>

<sup>a</sup>Photosciences and Photonics, Chemical Sciences and Technology Division, CSIR-National Institute for Interdisciplinary Science and Technology, Thiruvananthapuram-695 019

<sup>b</sup>Academy of Scientific and Innovative Research (AcSIR), CSIR-NIIST Campus, Thiruvananthapuram-695 019, Kerala, India.

<sup>c</sup>CSIR-Central Institute of Mining and Fuel Research, Dhanbad-826 015, Jharkhand, India.

<sup>d</sup>CSIR-North East Institute of Science & Technology, Jorhat-785 006, Assam, India.

E-mail: [rama@neist.res.in](mailto:rama@neist.res.in) or [d.ramaiah@gmail.com](mailto:d.ramaiah@gmail.com)

| SI No | Contents                                                                                                                                              | Page |
|-------|-------------------------------------------------------------------------------------------------------------------------------------------------------|------|
| 1     | Figures S1-S2 shows the $^1\text{H}$ NMR spectra of the dyads <b>1</b> and <b>2</b>                                                                   | S3   |
| 2     | Figures S3-S4 shows the $^1\text{H}$ NMR spectra of <i>p</i> -FOArBr and <i>m</i> -FOArBr                                                             | S4   |
| 3     | Figures S5-S6 shows the $^{13}\text{C}$ NMR spectra of the dyads <b>1</b> and <b>2</b>                                                                | S5   |
| 4     | Figures S7-S8 shows the $^{13}\text{C}$ NMR spectra of <i>p</i> -FOArBr and <i>m</i> -FOArBr                                                          | S6   |
| 5     | Figures S9-S10 shows the ESI mass spectra of the dyads <b>1</b> and <b>2</b>                                                                          | S7   |
| 6     | Figures S11-S12 shows the ESI mass spectra <i>p</i> -FOArBr and <i>m</i> -FOArBr                                                                      | S8   |
| 7     | Figures S13 shows CIE chromaticity diagram of the dyads <b>1</b> and <b>2</b> corresponding to the emission spectra in (A) toluene and (B) film state | S9   |
| 8     | Figures S14 shows ground state optimised geometries of the dyads <b>1</b> and <b>2</b>                                                                | S9   |
| 9     | Figure S15 shows device structure, current density-voltage plot and CIE chromaticity diagram of the OLEDs                                             | S10  |
| 10    | Tables S1-S2 shows summary of absorption and emission properties of dyad <b>1</b> and <b>2</b> in various solvents                                    | S11  |
| 11    | Tables S3 shows comparison of properties of the present dyads with previously reported D-A type emitters                                              | S12  |

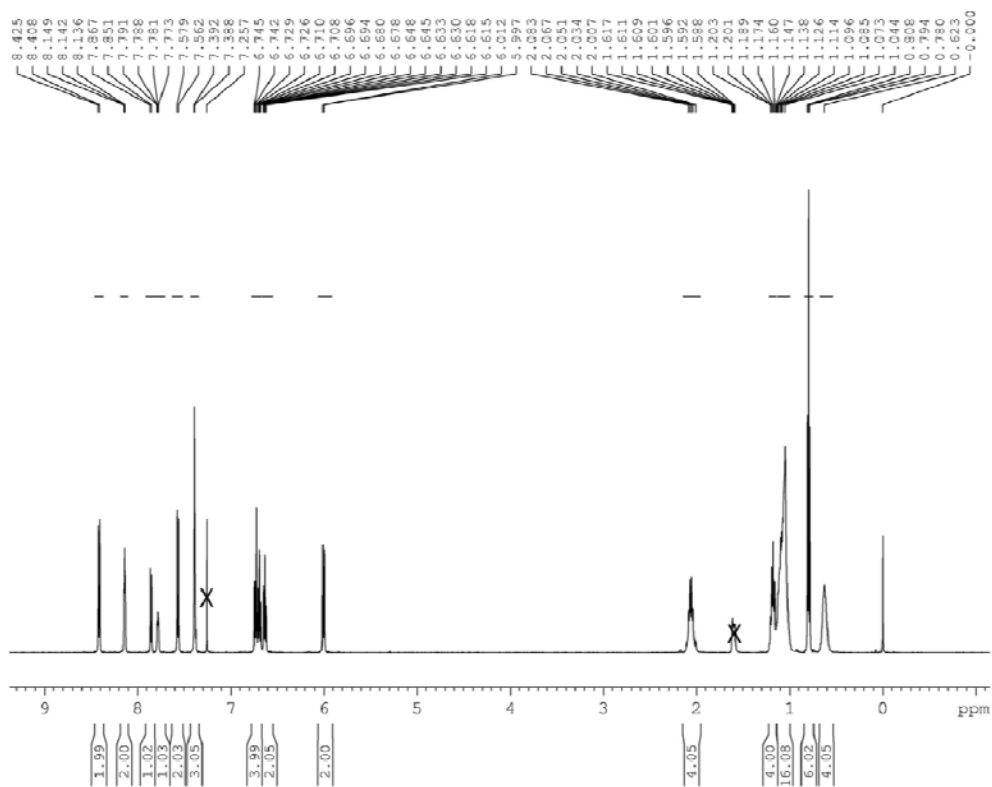

Fig. S1  $^1\text{H}$  NMR spectrum of the dyad **1** in  $\text{CDCl}_3$ .

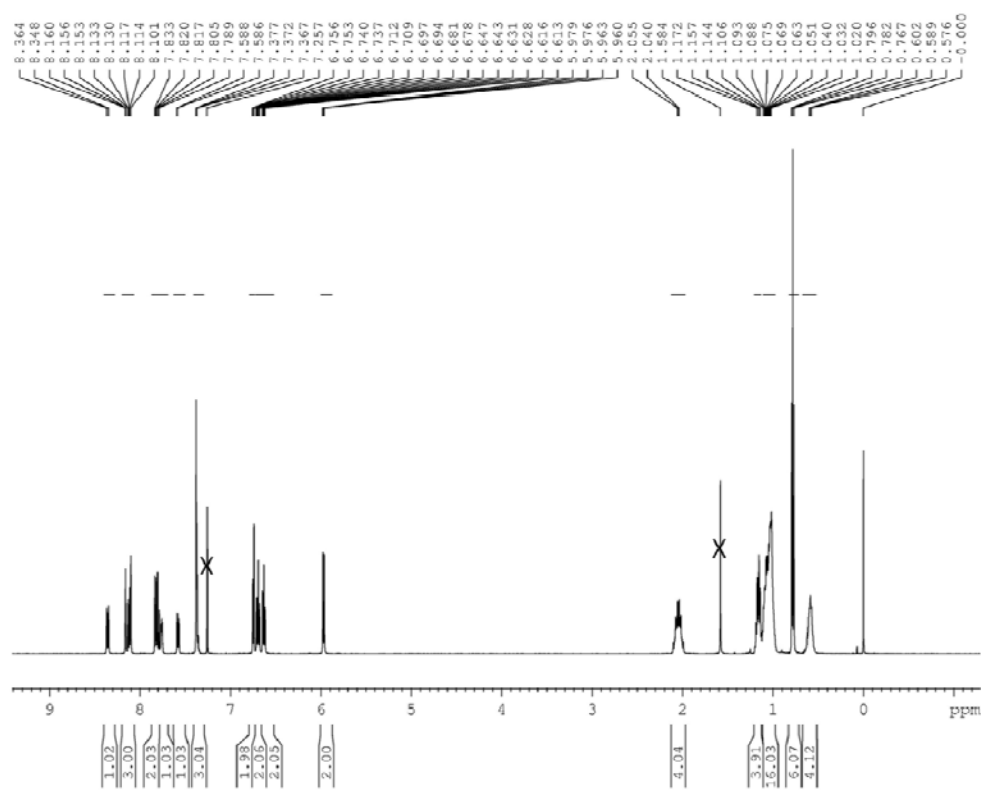

Fig. S2  $^1\text{H}$  NMR spectrum of the dyad **2** in  $\text{CDCl}_3$ .

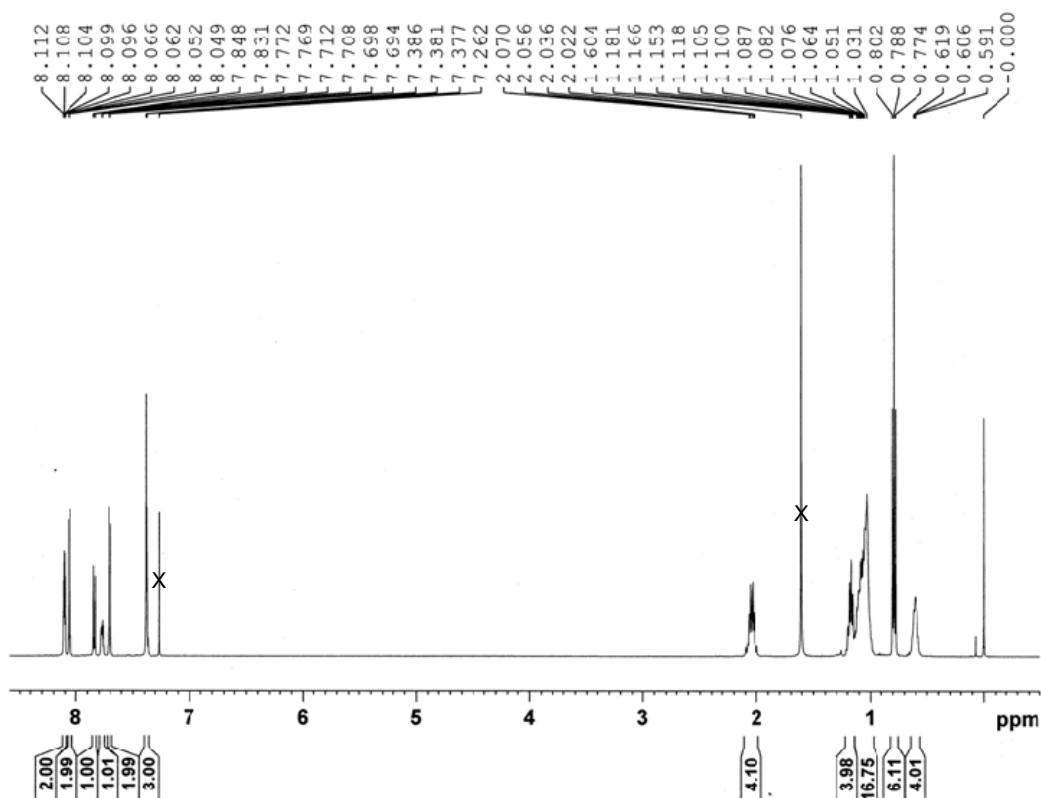

Fig. S3  $^1\text{H}$  NMR spectrum of *p*-FOArBr in  $\text{CDCl}_3$ .

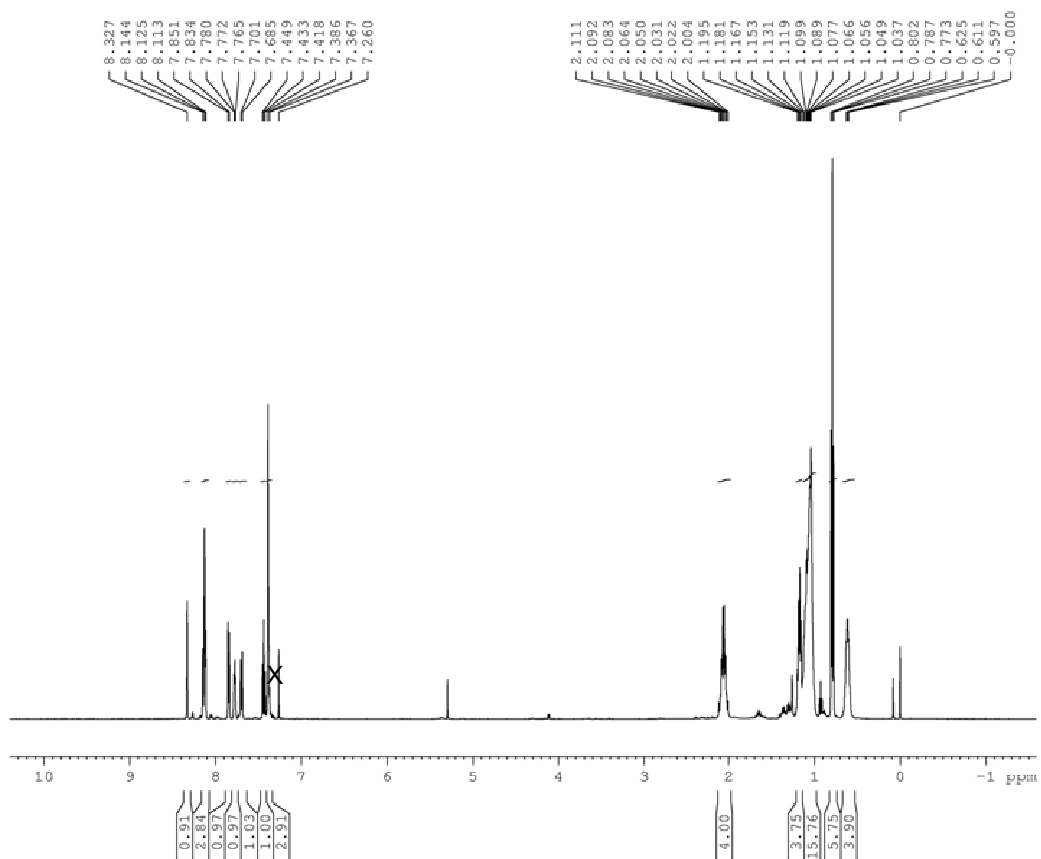

Fig. S4  $^1\text{H}$  NMR spectrum of *m*-FOArBr in  $\text{CDCl}_3$ .

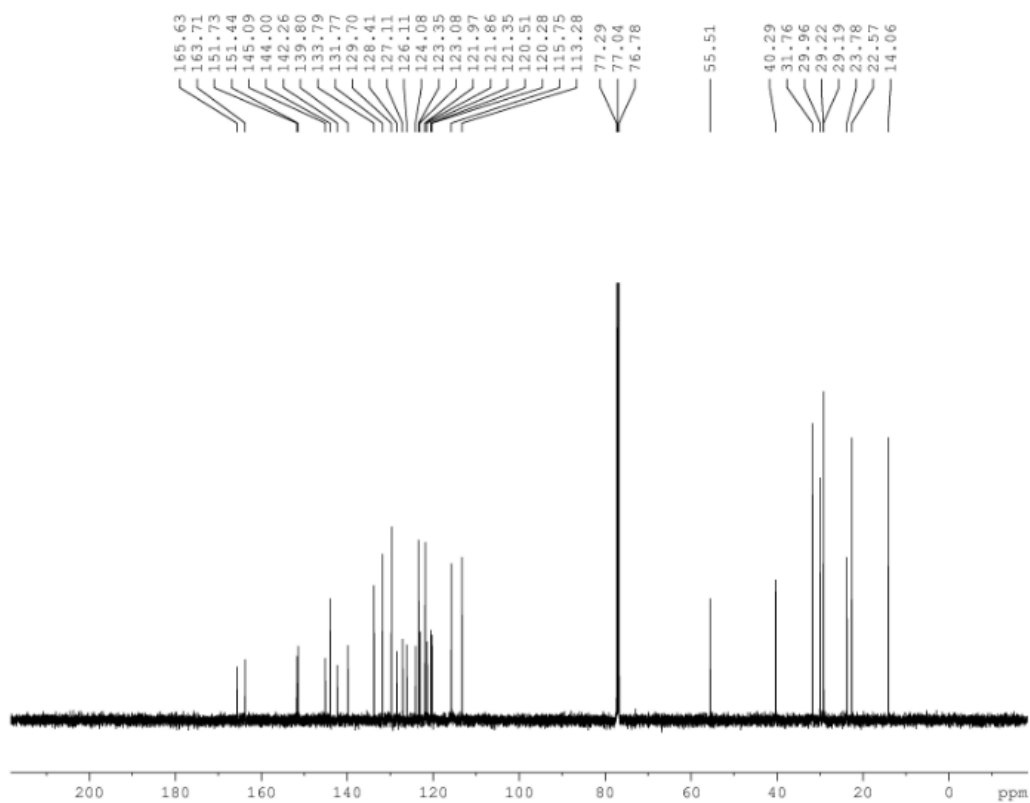

Fig. S5  $^{13}\text{C}$  NMR spectrum of the dyad **1** in  $\text{CDCl}_3$ .

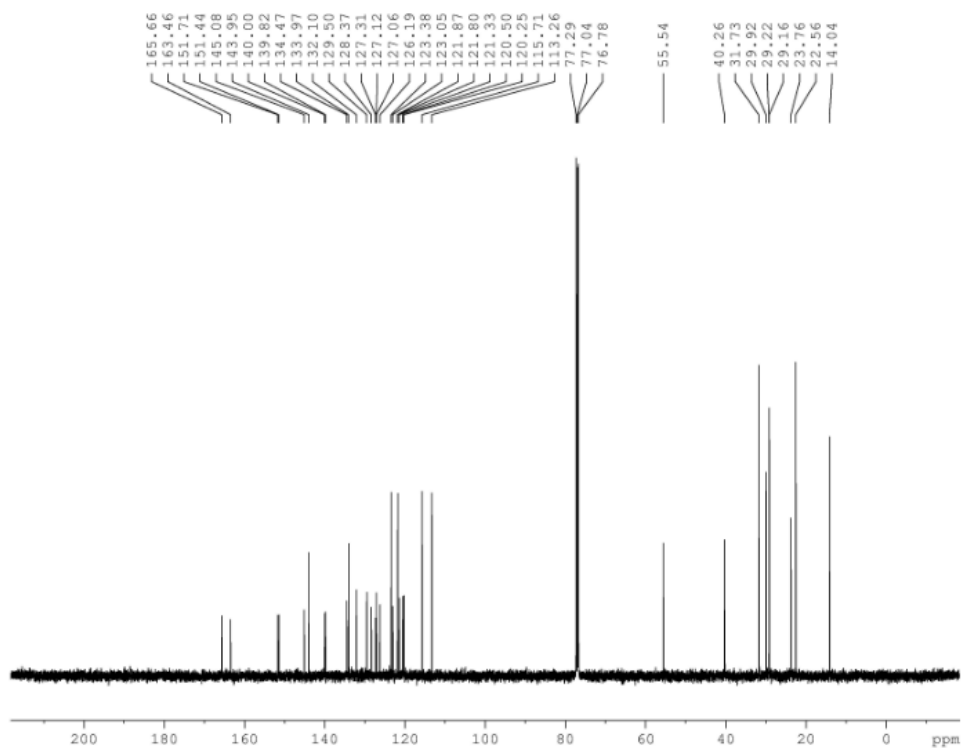

Fig. S6  $^{13}\text{C}$  NMR spectrum of the dyad **2** in  $\text{CDCl}_3$ .

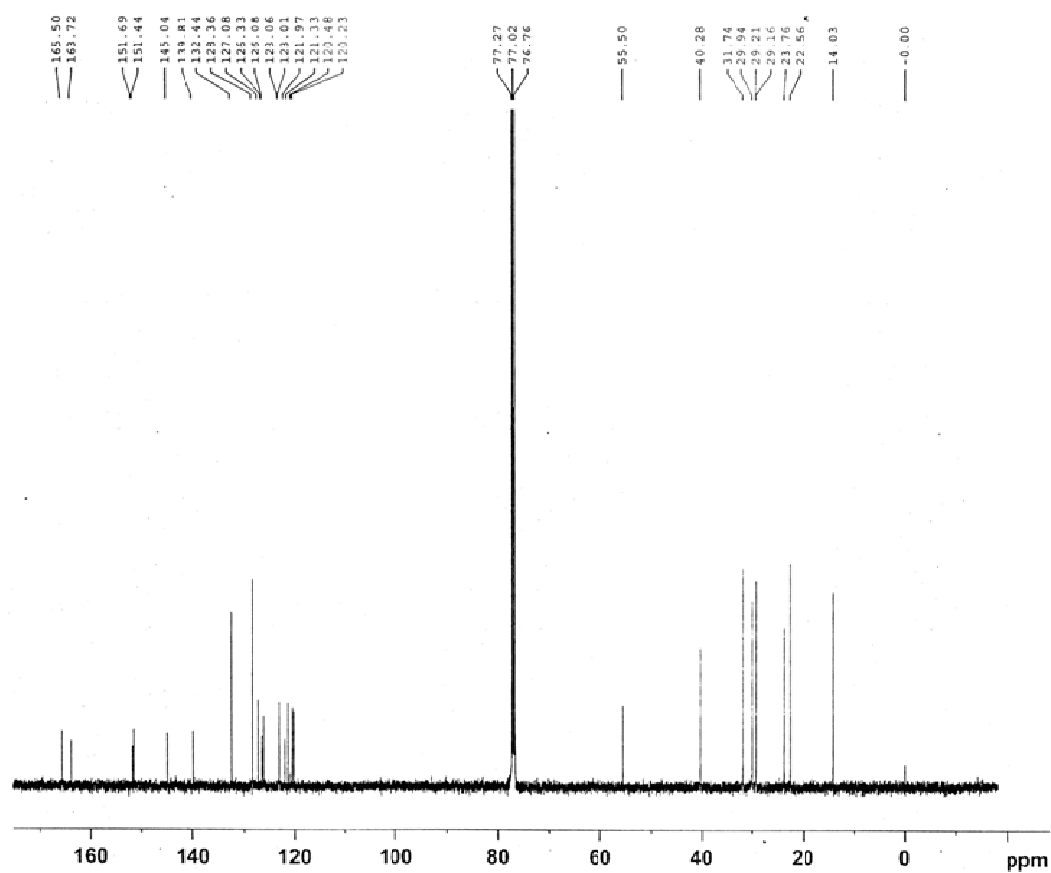

Fig. S7  $^{13}\text{C}$  NMR spectrum of *p*-FOArBr in  $\text{CDCl}_3$ .

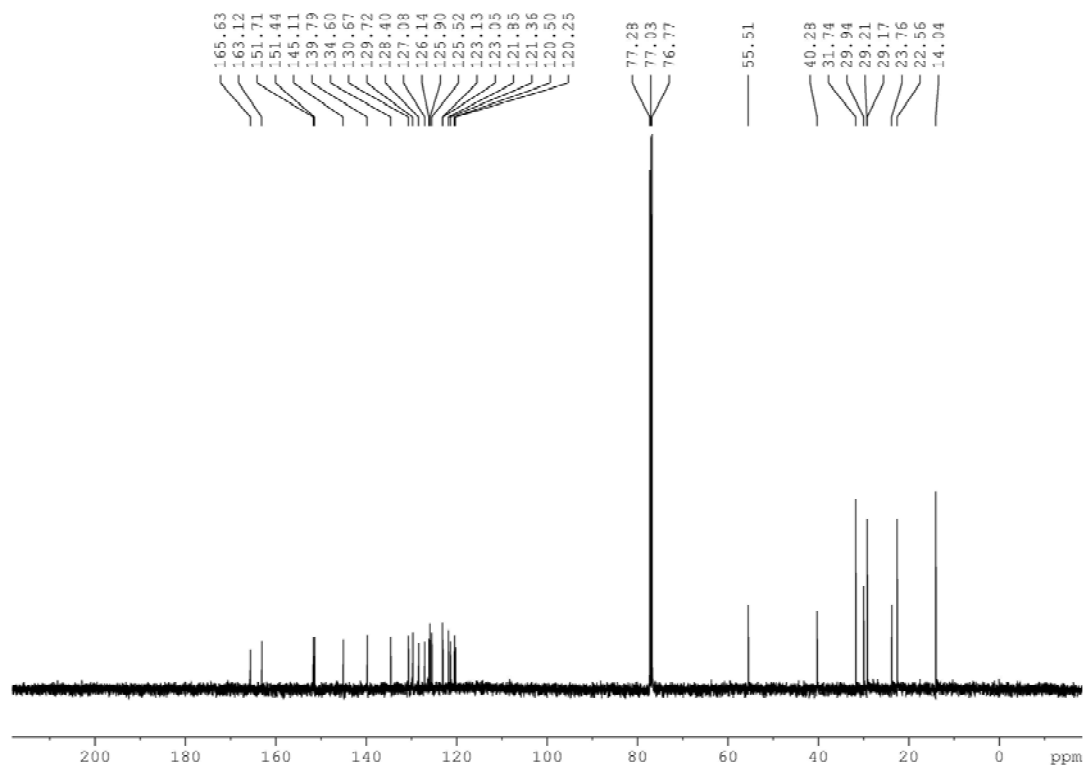

Fig. S8  $^{13}\text{C}$  NMR spectrum of *m*-FOArBr in  $\text{CDCl}_3$ .

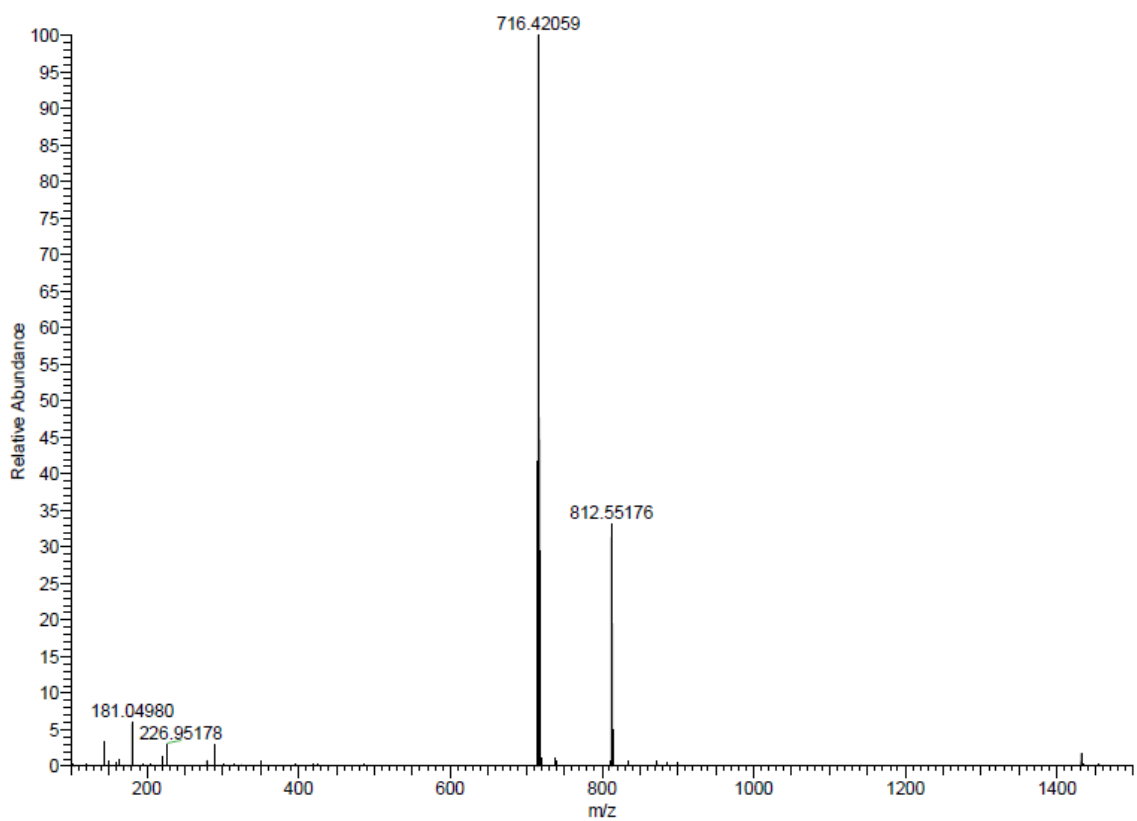

**Fig. S9** ESI mass spectrum of the dyad 1.

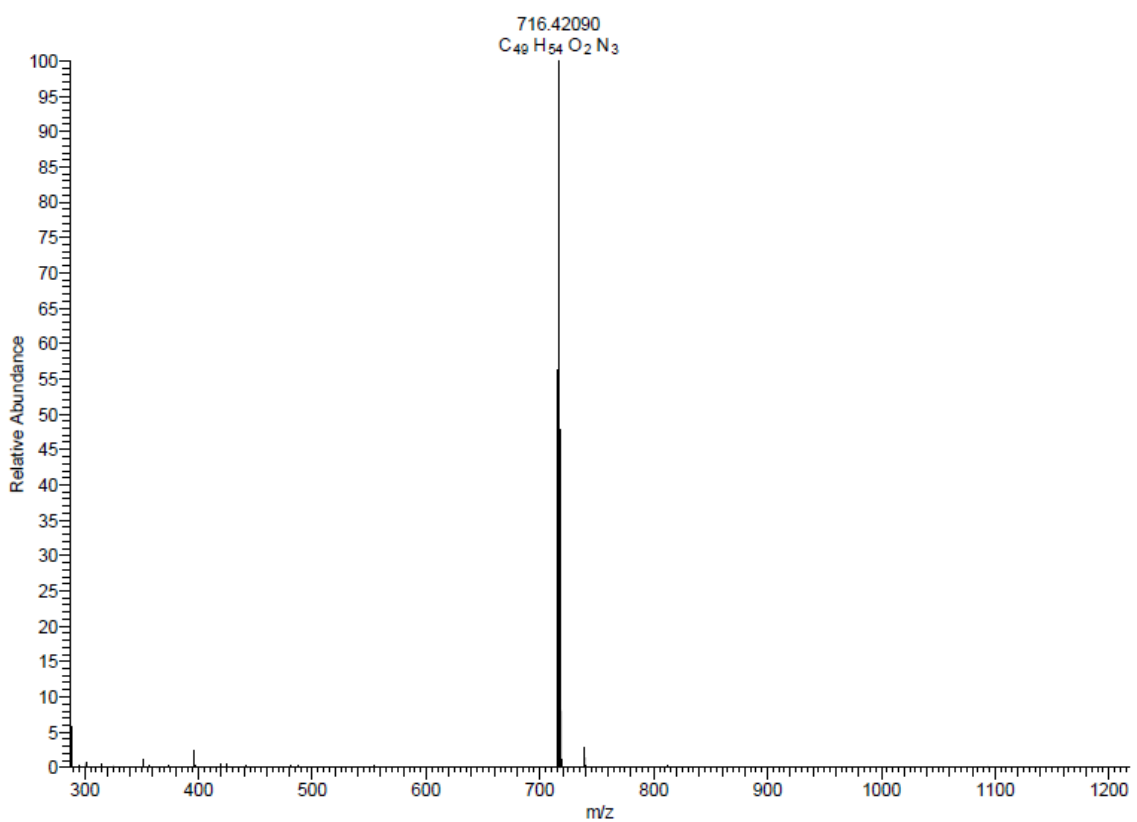

**Fig. S10** ESI mass spectrum of the dyad 2.

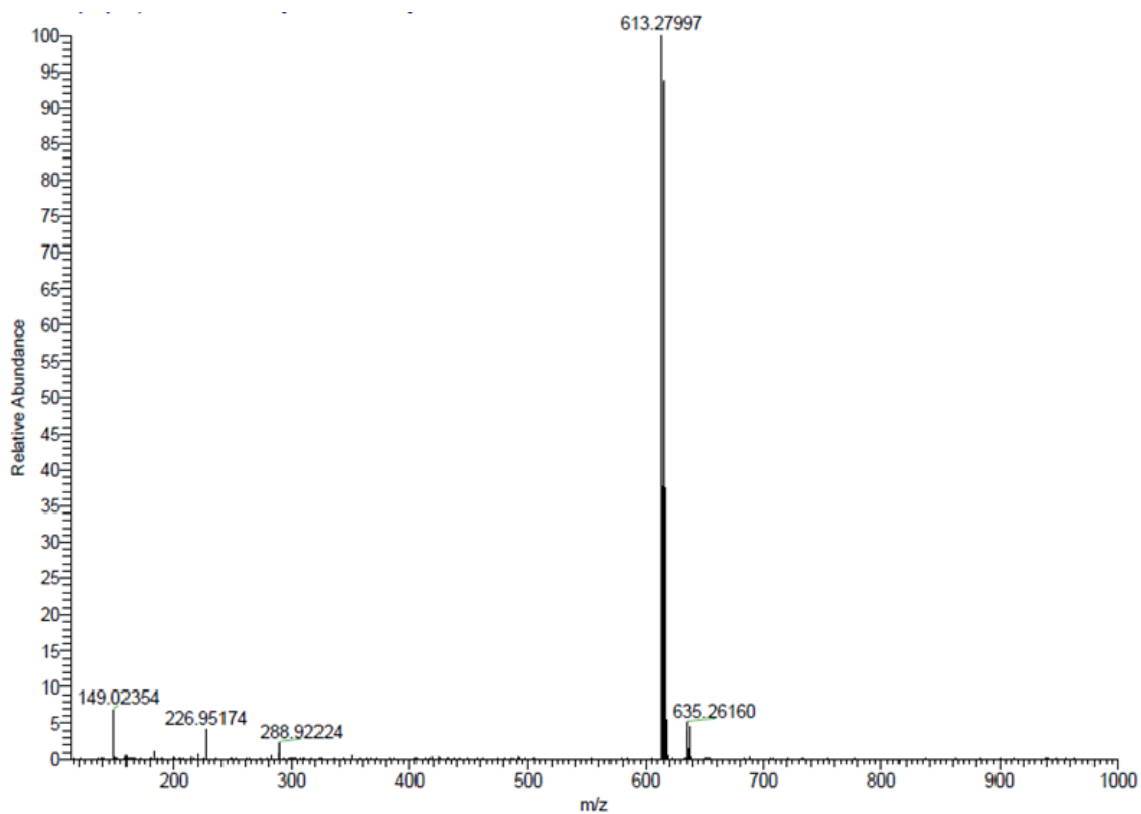

Fig. S11 ESI mass spectrum of *p*-FOArBr.

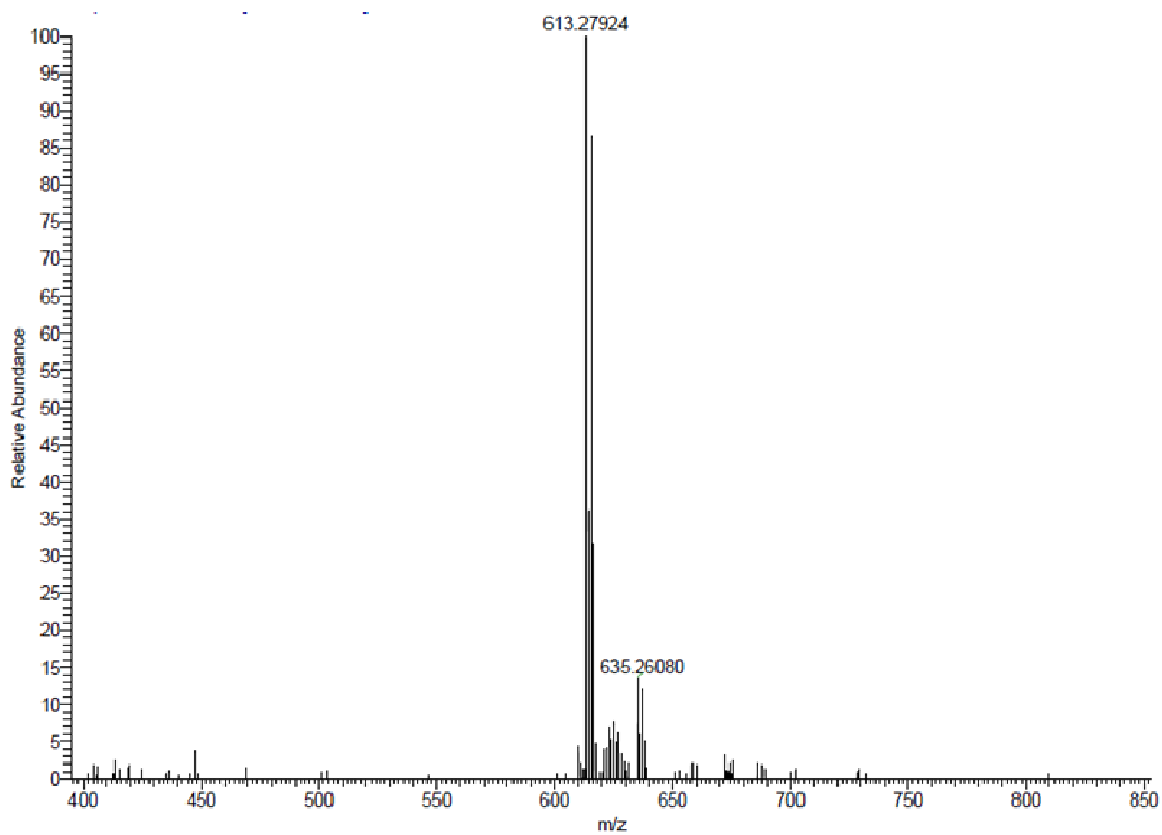

Fig. S12 ESI mass spectrum of *m*-FOArBr.



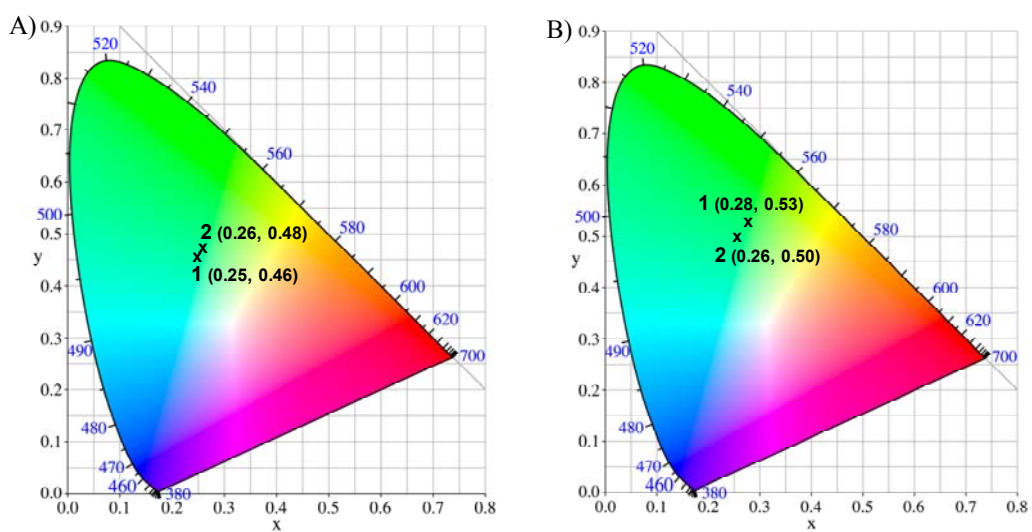

**Fig. S13** CIE chromaticity diagram of the dyads **1** and **2** corresponding to the emission spectra in (A) toluene and (B) thin film state.

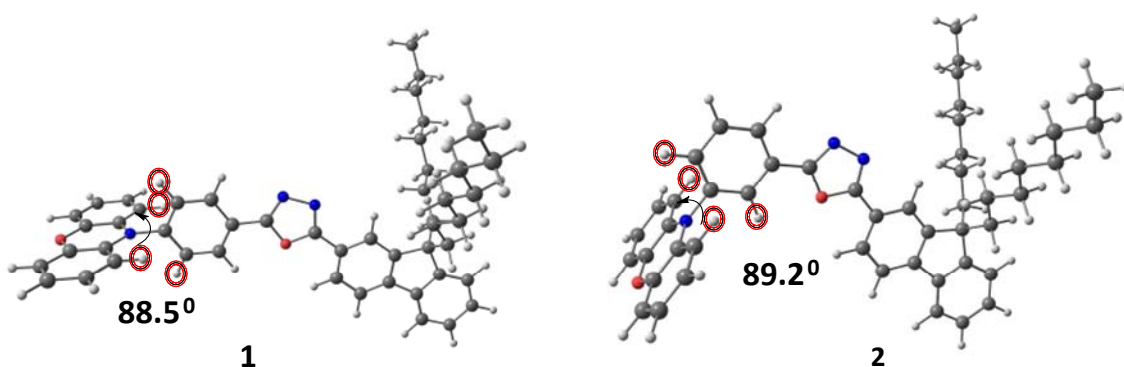

**Fig. S14** Ground state optimized geometries of the dyads **1** and **2**. The hydrogen atoms responsible for the twisted configuration are highlighted in red circles.

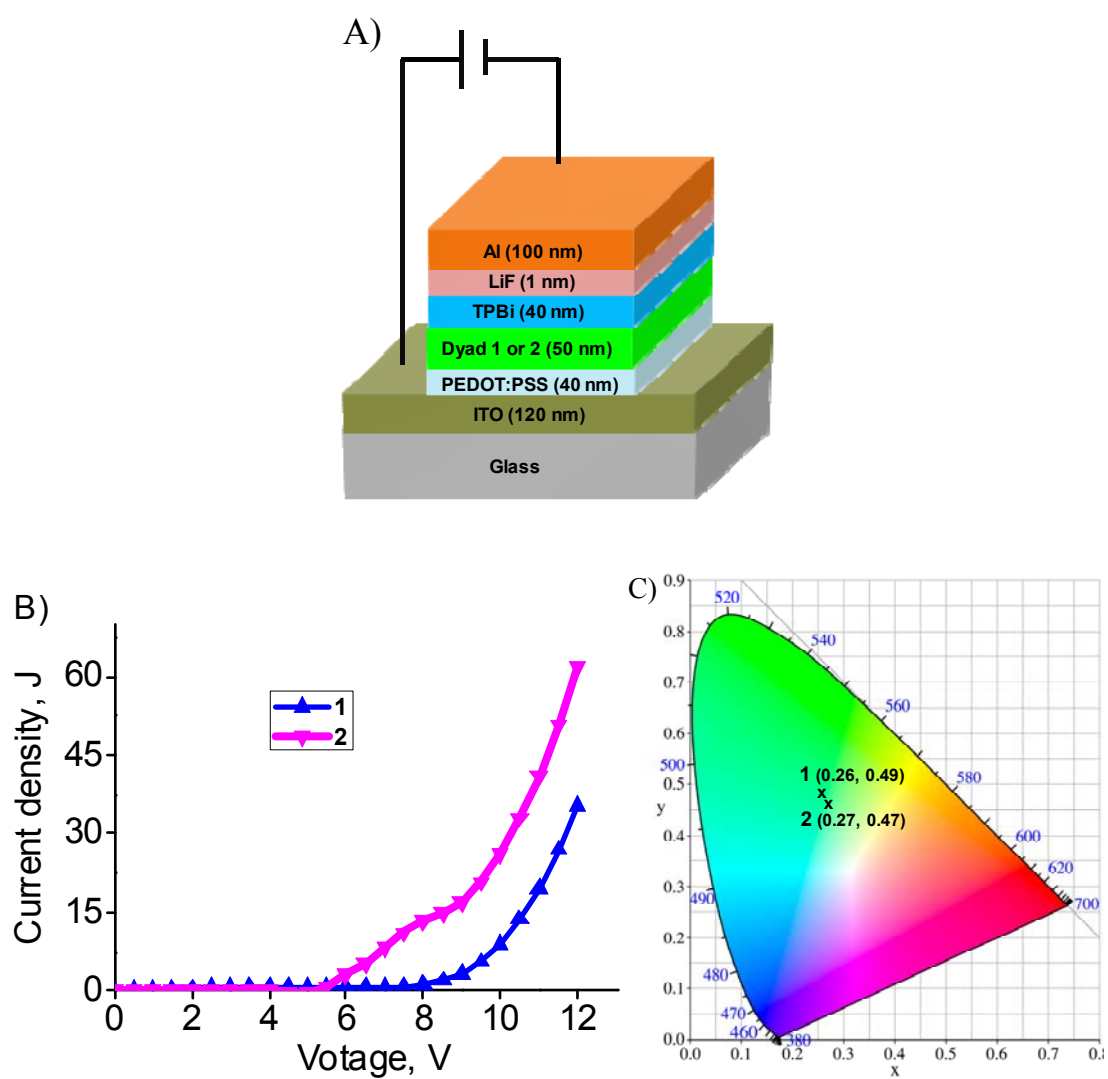

**Fig. S15** Device structure (A), current density-voltage plot (B) and CIE chromaticity diagram (C) of the OLEDs fabricated using the dyads 1 and 2.

**Table S1** Absorption and emission properties of dyad **1** in different solvents.<sup>a</sup>

| Solvents     | $\epsilon$ | n    | $\Delta f$ | $\lambda_a$<br>(nm) | $\nu_a$<br>( $\text{cm}^{-1}$ ) | $\lambda_f$<br>(nm) | $\nu_f$<br>( $\text{cm}^{-1}$ ) | $\nu_a - \nu_f$<br>( $\text{cm}^{-1}$ ) |
|--------------|------------|------|------------|---------------------|---------------------------------|---------------------|---------------------------------|-----------------------------------------|
| Cyclohexane  | 2.02       | 1.43 | 0.005      | 327,390             | 30581.0                         | 465                 | 21505.4                         | 9075.6                                  |
| Toluene      | 2.38       | 1.49 | 0.013      | 328,390             | 30487.8                         | 505                 | 19801.9                         | 10685.8                                 |
| DCM          | 9.10       | 1.42 | 0.220      | 328,380             | 30487.8                         | 562                 | 17793.6                         | 12694.2                                 |
| Acetone      | 21.00      | 1.36 | 0.286      | 328,373             | 30487.8                         | 598                 | 16722.4                         | 13765.4                                 |
| Acetonitrile | 37.50      | 1.35 | 0.303      | 326,372             | 30674.8                         | 620                 | 16129.0                         | 14545.7                                 |

<sup>a</sup>Average of more than three independent experiments,  $\epsilon$ : dielectric constant, n: refractive index,  $\Delta f$ : solvent polarity parameter,  $\lambda_a$ : absorption wavelength,  $\nu_a$ : wave number corresponds to absorption maximum,  $\lambda_f$ : fluorescence wavelength,  $\nu_a$ : wave number corresponds to fluorescence maximum.

**Table S2** Absorption and emission properties of dyad **2** in different solvents.<sup>a</sup>

| Solvents     | $\Delta f$ | $\lambda_{\text{abs}}$<br>(nm) | $\nu_a$<br>( $\text{cm}^{-1}$ ) | $\lambda_f$<br>(nm) | $\nu_f$<br>( $\text{cm}^{-1}$ ) | $\nu_a - \nu_f$<br>( $\text{cm}^{-1}$ ) |
|--------------|------------|--------------------------------|---------------------------------|---------------------|---------------------------------|-----------------------------------------|
| Cyclohexane  | 0.005      | 328,345                        | 30487.8                         | 465                 | 21505.38                        | 8982.4                                  |
| Toluene      | 0.013      | 330,345                        | 30303.0                         | 522                 | 19157.09                        | 11145.9                                 |
| DCM          | 0.220      | 329,343                        | 30395.1                         | 575                 | 17391.30                        | 13003.8                                 |
| Acetone      | 0.286      | 328,341                        | 30487.8                         | 610                 | 16393.44                        | 14094.4                                 |
| Acetonitrile | 0.303      | 326,340                        | 30674.8                         | 625                 | 16000.00                        | 14674.8                                 |

<sup>a</sup>Average of more than three independent experiments,  $\Delta f$ : solvent polarity parameter,  $\lambda_a$ : absorption wavelength,  $\nu_a$ : wave number corresponds to absorption maximum,  $\lambda_f$ : fluorescence wavelength,  $\nu_a$ : wave number corresponds to fluorescence maximum.

**Table S3** Comparison of properties of the present dyads with previously reported D-A type emitters.

| Sl. No | Publication                                                     | D-A Type                                | Thermal stability and device performance                                                                                                                                                                                                          |
|--------|-----------------------------------------------------------------|-----------------------------------------|---------------------------------------------------------------------------------------------------------------------------------------------------------------------------------------------------------------------------------------------------|
| 1      | Current Paper                                                   | Phenoxazine - Oxadiazole                | Thermally stable up to 425 °C, excellent solution process-ability, film morphologies and un-doped OLED device performance based on dyad <b>1</b> : $L_{\max} = 1751 \text{ cd/m}^2$ , $\lambda_{\text{ems}} = 504 \text{ nm}$ , CIE (0.26, 0.49). |
| 2      | <i>Photochem. Photobiol. Sci.</i> , 2014, <b>13</b> , 342 – 357 | Anthracene - Oxadiazole                 | Thermally stable up to 364 °C and un-doped OLED device performance based on dyad <b>8A</b> : $L_{\max} = 1284 \text{ cd/m}^2$ , $\lambda_{\text{ems}} = 485 \text{ nm}$ , $V_{\text{onset}} = 3\text{V}$ .                                        |
| 3      | <i>New J. Chem.</i> , 2014, <b>38</b> , 2368 – 2378             | Indolo[3,2-b]carbazole - Dimesitylboron | Thermally stable up to 210 °C and un-doped OLED device performance based on dyad <b>A</b> : $L_{\max} = 5634 \text{ cd/m}^2$ ; $\lambda_{\text{ems}} = 472 \text{ nm}$ ; $V_{\text{onset}} = 6.1 \text{ V}$                                       |
| 4      | <i>Chem. Asian J.</i> 2013, <b>8</b> , 2111 – 2124              | Pyrene - Pyrenoimidazole                | Thermally stable up to 500 °C and doped blue OLED device performance based on dyad <b>4c</b> : $L_{\max} = 2980 \text{ cd/m}^2$ ; CIE (0.156, 0.135)                                                                                              |
| 5      | <i>Chem. Asian J.</i> 2010, <b>5</b> , 2093 – 2099              | Triphenylamine - Benzimidazole          | Thermally stable up to 531 °C and un-doped blue OLED device performance based on dyad <b>A</b> : $L_{\max} = 4448 \text{ cd/m}^2$ ; $V_{\text{onset}} = 3.5 \text{ V}$ ; CIE (0.17, 0.07)                                                         |
| 6      | <i>J. Mater. Chem.</i> , 2009, <b>19</b> , 6172–6184            | Anthracene – Oxadiazole                 | Thermally stable up to 460 °C and un-doped OLED device performance based on dyad <b>5</b> : $L_{\max} = 1996 \text{ cd/m}^2$ , $\lambda_{\text{ems}} = 535 \text{ nm}$ , $V_{\text{onset}} = 4\text{V}$ .                                         |
